# Supplementary material
Source: PubMed Central journal article supplement (PMC4108200)
Supplement: NIHMS587939-supplement-Supplemental_Data.pdf [file NIHMS587939-supplement-Supplemental_Data.pdf]

1

2 **Supplemental Materials:**

3 **Figure 1. Apoptosis induction by Adjudin was not detected in the early periods of**  
4 **treatment.**

5 A549 cells (A) and PC3 cells (B) were treated for the indicated time periods with  
6 different concentrations of Adjudin. Apoptosis triggered by Adjudin was assayed by flow  
7 cytometric measurement of Annexin V and 7-AAD double staining. The quantification of  
8 the apoptotic cells was achieved by averaging the results of three independent flow  
9 cytometric analyses.

10

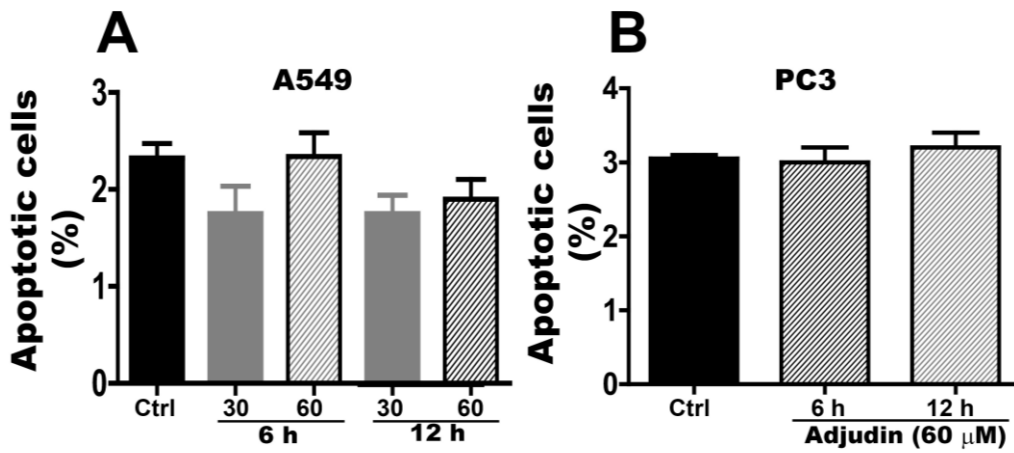

11  
12  
13  
14  
15  
16  
17  
18  
19  
20  
21  
22  
23  
24  
25  
26  
27  
28

1

2 **Figure 2. Rotenone induced the AIF nuclear translocation in PC-12 cells.**

3 PC-12 cells were treated with 0.5  $\mu$ M Rotenone for 24 h and stained for AIF. Green,  
4 AIF; Blue, nuclei (DAPI). The scale bar shown in (a) represents 15  $\mu$ m. (j) The protein  
5 levels of AIF in the cytosol and nuclei after treatment with 0.5  $\mu$ M Rotenone for 24 h were  
6 determined by Western blot using the extracts from the two isolated fractions of PC-12  
7 cells. The  $\beta$ -actin and Lamin A/C were served as loading controls of the cytosolic and  
8 nuclear protein extracts.

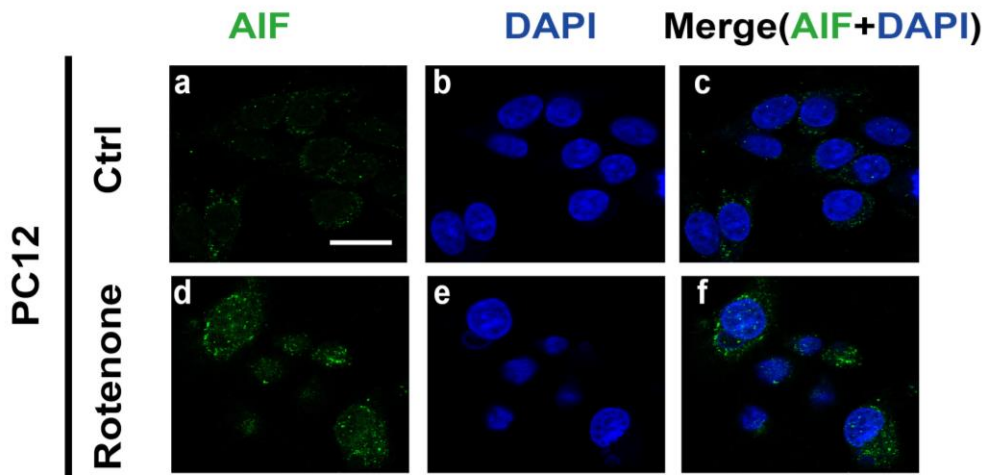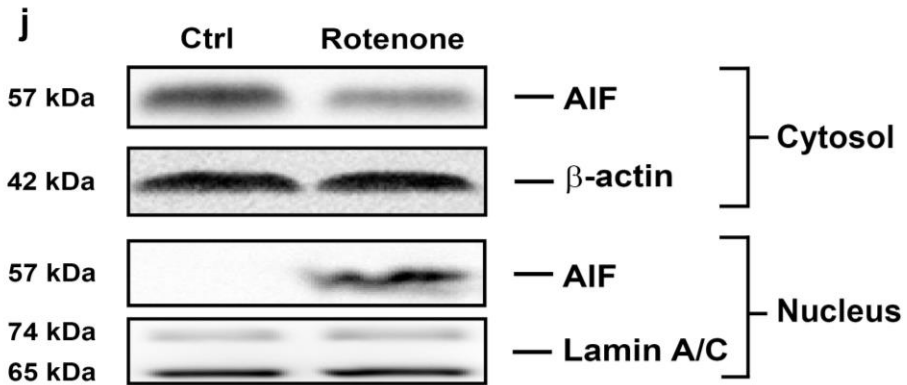

9

10
